# Supplementary material
Source: Royal Society of Chemistry journal article supplement (doi:10.1039/d5bm00817d)
Supplement: d5bm00817d1.pdf [file d5bm00817d1.pdf]

## Supplementary Data

### Genetically Engineered *Spirulina Plantensis* Producing Human Insulin as a Potential Novel Oral Drug Delivery Carrier

**Dhaval Patel<sup>1</sup>, Eliyahu Drori<sup>1</sup>, Valeria Rahamim<sup>1</sup>, Aman Thakur<sup>1</sup>, Adi Dahan<sup>1</sup>, Sivan Meir<sup>1</sup>, Yamm Anker<sup>1</sup>, Palak Sangrai<sup>1</sup>, Yaakov Anker<sup>1</sup>, and Aharon Azagury<sup>1\*</sup>**

<sup>1</sup> The Department of Chemical Engineering and Biotechnology, Ariel University, Ariel-407000, Israel

*\*Corresponding author:* Dr. Aharon Azagury [aharona@ariel.ac.il](mailto:aharona@ariel.ac.il)

## 1. Plasmid Design

Transformation using *Agrobacterium* for genetic manipulation requires a binary vector. The binary vectors used for *Agrobacterium* transformation are derived from the tumour-inducing plasmid (Ti-plasmid). *Agrobacterium* transfers a part of the Ti-plasmid DNA (i.e., transfer DNA or T-DNA) into the plant genome <sup>1</sup>. The binary vector contains two T-DNA repeats flanking the DNA sequence (in this case, the human insulin (hINS) gene sequence), which will be transferred to the host plant. The following figure (**Fig. S1**) illustrates the components of the pCAMBIA-based plasmid containing the gene of interest, human insulin (hINS), used in the study. The pCAMBIA is a plant expression vector developed by the Cambia Foundation. A similar plasmid was reported to be used to transform *Dunaliella pseudosalina* <sup>2</sup>, and *Arthrospira platensis* <sup>3</sup>.

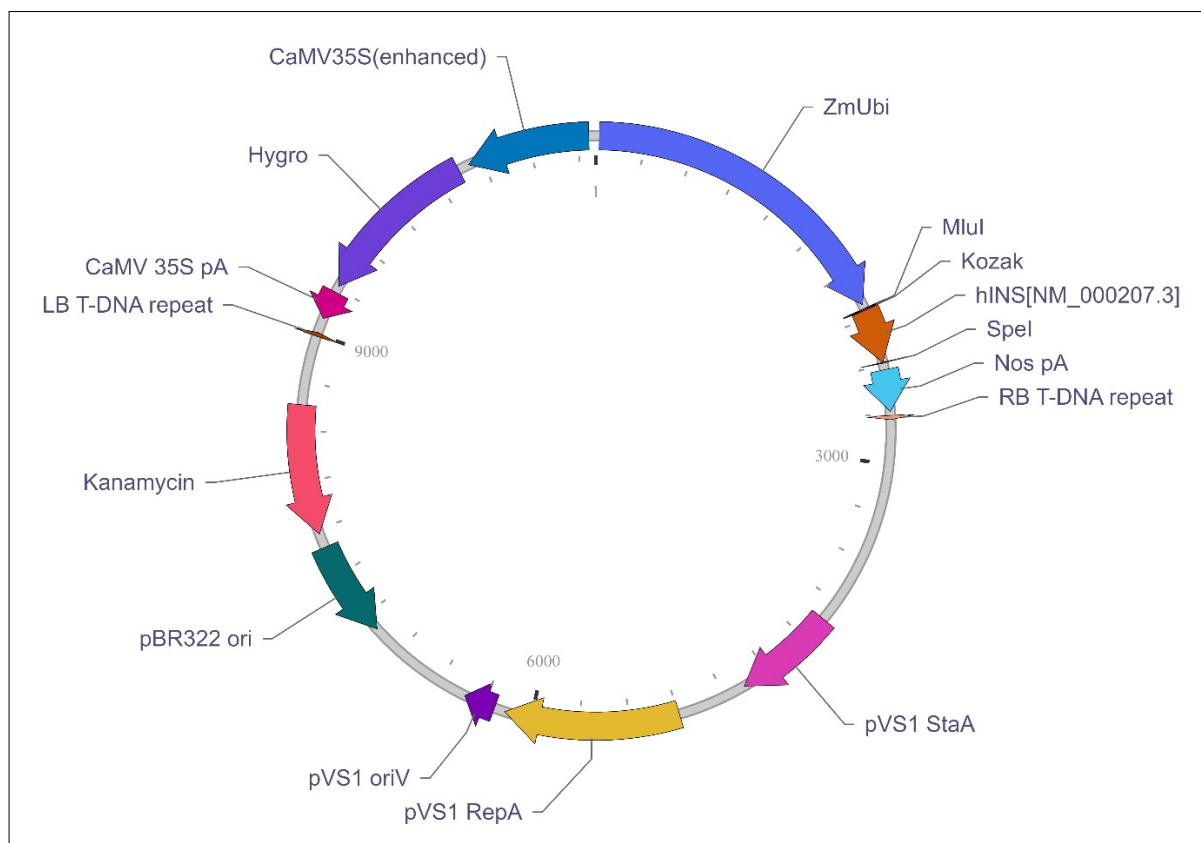

**Figure S1:** pCAMBIA-based plasmid with hINS gene designed using the VectorBuilder online tool.

## 2. Antibiotic Sensitivity Testing

Antibiotic sensitivity testing is crucial for distinguishing between transformed and untransformed cells. In the present study, we used the kanamycin and hygromycin resistance

genes to design a pCAMBIA-based binary vector plasmid to screen for transformed *Spirulina* after transformation. Therefore, in the present study, we assessed *Spirulina's* sensitivity to various antibiotics, including penicillin, streptomycin, penicillin + streptomycin, hygromycin, rifampicin, cefotaxime, and kanamycin. The following figure (**Fig. S2**) illustrates the results of antibiotic sensitivity testing of *Spirulina* against various antibiotics.

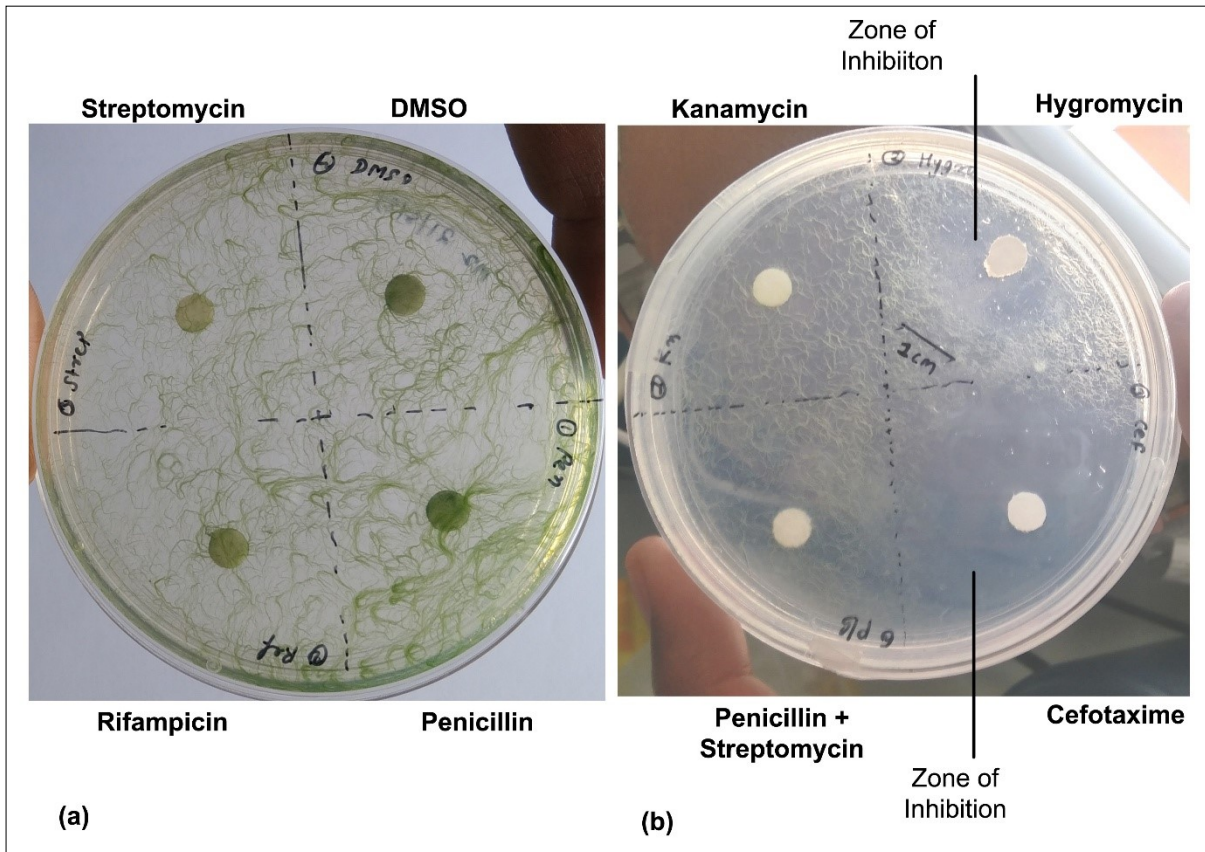

**Figure S2:** Antibiotic sensitivity of *Spirulina* grown on solid MS medium; **(a)** DMSO, penicillin, streptomycin, and rifampicin antibiotic discs (with no zone of inhibition); **(b)** Kanamycin, hygromycin, and cefotaxime antibiotic disc (with the zone of inhibition and lawn growth of *Spirulina*), penicillin + streptomycin antibiotic disc.

As illustrated in **Fig. S2**, *Spirulina* grew around the disc-shaped area of penicillin, streptomycin, penicillin + streptomycin, rifampicin, and kanamycin antibiotics, as well as DMSO (**Fig. S2a** and **Fig. S2 b**), indicating that *Spirulina* was resistant to these antibiotics and to DMSO. In contrast, *Spirulina* filaments were not detected around the disc containing the antibiotics hygromycin and cefotaxime (**Fig. S2b**), indicating that *Spirulina* is sensitive to **hygromycin and cefotaxime**. Moreover, it is clear from **Fig. S2b** that *Spirulina* is more sensitive to cefotaxime than hygromycin. Based on these results, we designed our transfection

plasmid and added a hygromycin resistance gene, which can be exploited to screen out transformed *Spirulina* from untransformed *Spirulina*.

### 3. Plasmid Isolation

The *E. Coli* DH5 $\alpha$  used for plasmid isolation was checked for contamination by streaking on an antibiotic-containing LB plate using a four-sector streaking technique. A well-grown and isolated colony was then selected for plasmid extraction. The purity and integrity of the isolated plasmid were verified by 1% agarose gel electrophoresis using both undiluted and 1:10-diluted plasmid extracts. The results are depicted in **Fig. S3** below.

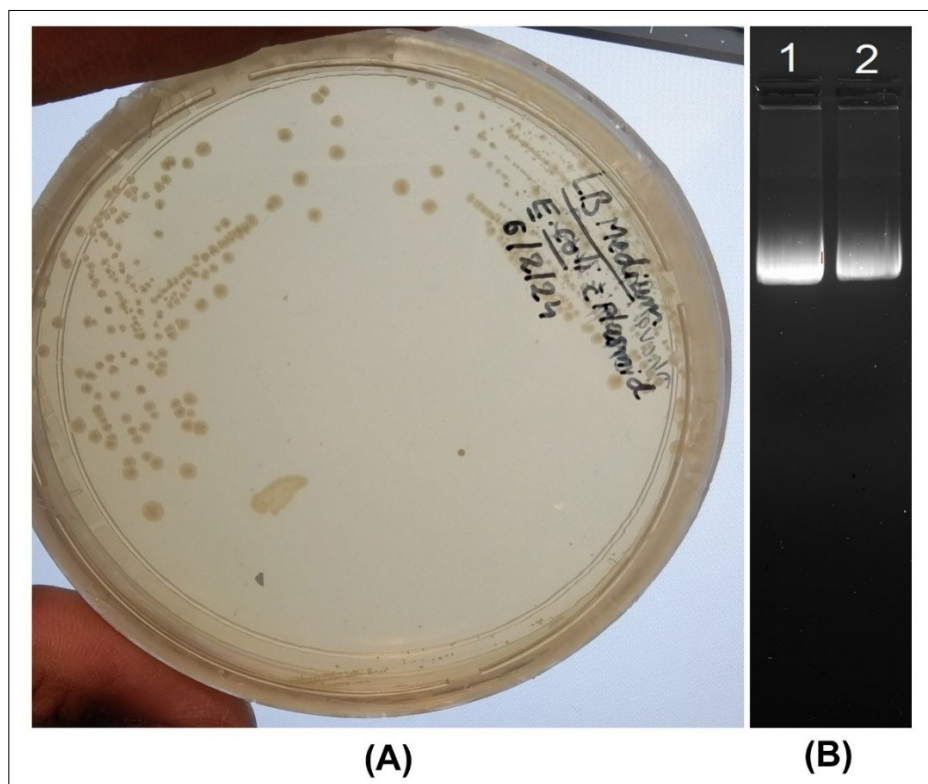

**Figure S3:** (A) Isolated colonies of *E. coli* DH5 $\alpha$  grown on kanamycin-containing LB plate at 37 °C for 24 h, (B) Assessing plasmid purity on 1% agarose gel electrophoresis (Lane 1 → plasmid sample from direct extract, Lane 2 → 1:10 diluted plasmid sample from direct extract).

**Figure S3a** presents the four sectors streaking on a kanamycin-containing LB plate to obtain well-grown and isolated colonies of *E. coli* DH5 $\alpha$  containing the plasmid construct. **Figure S3b** depicts a single band of plasmid extracted from a well-grown and isolated colony

of *E. coli* DH5 $\alpha$ . A single band in lane 1 (i.e., undiluted plasmid extract) and lane 2 (i.e., 1:10 diluted plasmid extract) indicates the plasmid was pure and intact, which can be used for transformation. Although a DNA ladder is not included in this gel, a compact band corresponding to supercoiled and open circular plasmid, also confirmed by downstream PCR of hINS insert.

#### 4. Standard Plate Count

The *Agrobacterium* culture was diluted to  $10^{-5}$  and plated on an LB medium containing the appropriate antibiotics. The results of all dilutions are shown in **Fig. S4**.

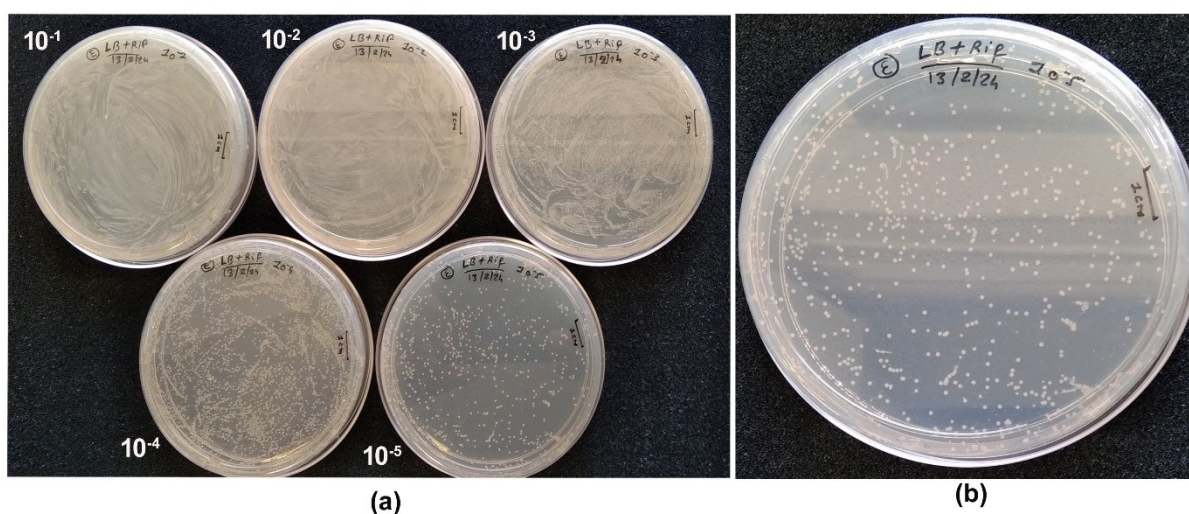

**Figure S4:** (a) Dilution plates (from  $10^{-1}$  to  $10^{-5}$ ) of the standard plate count of *Agrobacterium* after transformation. (b) Colonies of *Agrobacterium* on a Rifampicin-containing medium.

As shown in **Fig. S4**, the plates of  $10^{-1}$  to  $10^{-4}$  dilution exhibited lawn growth of bacteria, and therefore, it isn't easy to pick up a single colony for colony PCR (**Fig. S4a**). The plate corresponding to the  $10^{-5}$  dilution displayed well-isolated colonies (**Fig. S4b**) and was selected for colony PCR analysis. Colony PCR was performed to detect the presence of the hINS gene in the colony using hINS-specific primers, eliminating the need to isolate genomic DNA from the bacteria.

Transformation efficiency measures a bacterium's ability to take up DNA. It depends on the competence of bacteria and the quality of plasmid DNA used. In the present study, the transformation efficiency of *Agrobacterium* was  $2.86 \times 10^8$  CFU/ $\mu$ g of DNA, indicating that the bacteria were healthy and had sufficient intact plasmid to transform the *Spirulina*. The successful transformation in *Agrobacterium* was verified using colony PCR (see **Fig. 2**; readers are advised to refer to **Section 3** in the main article).

## 5. Integrity of hINS

The integrity of the extracted hINS from the SIF exposure experiment was evaluated by Laemmli SDS PAGE followed by silver staining (**Figure S5**). Briefly, we incubated the GE *Spirulina* in SIF containing 1 mg/mL pancreatin for 3 h at 37°C with slight shaking. The hINS integrity was assessed from the suspension taken at the start (0 h) and after 3 h of exposure to SIF from the cell-free supernatant, followed by lysing the algae at both time points. The results are as follows.

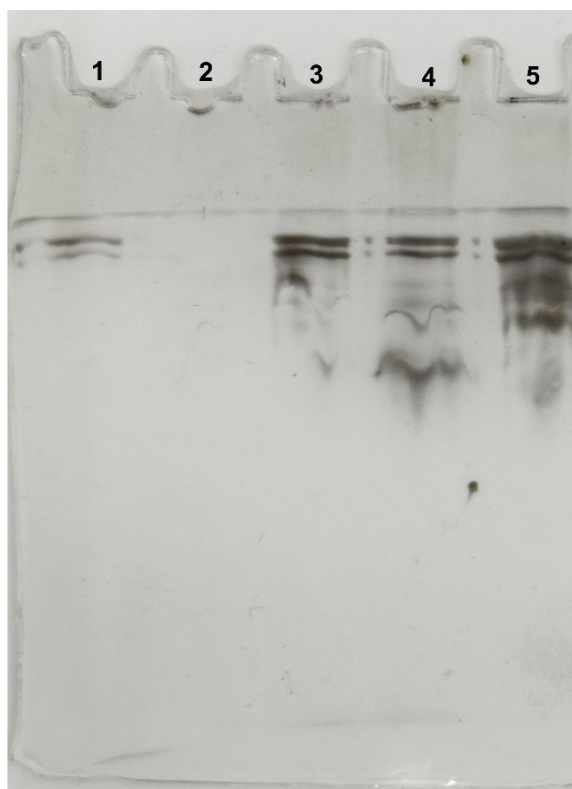

**Figure S5:** SDS PAGE (silver staining) of SIF exposure experiment. Lane 1 → standard/commercial hINS (200 µIU/mL), Lane 2 → cell-free broth at zero h, Lane 3 → cell-free broth at 3 h, Lane 4 → cell lysate at 3 h, Lane 5 → cell lysate at zero h.

As shown in **Figure S5**, the commercial hINS at a concentration of 200 µIU/mL was detected as two separate bands in Lane 1. Similar bands were also observed in Lanes 3 to 5, confirming that hINS remained intact inside GE *Spirulina* even after 3 h of incubation in SIF (Lane 4 compared to 5). Furthermore, we detected hINS in the SIF medium after 3 h of incubation, as evidenced by a band in Lane 3 that was absent before incubation (see Lane 2). These results indicate that the hINS in GE *Spirulina* is protected when exposed to SIF medium for 3 h.

## References

1. L. Lee and S. B. Gelvin, *Plant Physiol.*, 2008, **146**, 325–332.
2. J. Dehghani, A. Movafeghi, A. Barzegari, and J. Barar, *Efficient and stable transformation of *Dunaliella pseudosalina* by 3 strains of *Agrobacterium tumefaciens**, Maad Rayan Publishing Company, 2017.
3. J. Dehghani, K. Adibkia, A. Movafeghi, A. Barzegari, M. M. Pourseif, H. Maleki Kakelar, A. Golchin, and Y. Omid, *Appl. Microbiol. Biotechnol.*, 2018, **102**, 9267–9278.
